# Supplementary material for: Molecularly tailored perovskite/poly(3-hexylthiophene) interfaces for high-performance solar cells
Source: Royal Society of Chemistry journal article supplement (doi:10.1039/d4ee02251c), 2024-01-01
Supplement: d4ee02251c1.pdf [file d4ee02251c1.pdf]

## Supporting Information

### **Molecularly Tailored Perovskite/Poly(3-hexylthiophene) Interfaces for High-performance Solar Cells**

Ming-Hua Li,<sup>‡</sup> <sup>ab</sup> Xinbo Ma,<sup>‡c</sup> Jiaju Fu,<sup>a</sup> Shuo Wang,<sup>a</sup> Jinpeng Wu,<sup>a</sup> Run Long,<sup>\*c</sup> and Jin-Song Hu<sup>\*ad</sup>

<sup>a</sup> Beijing National Laboratory for Molecular Sciences (BNLMS), Institute of Chemistry, Chinese Academy of Sciences, Beijing 100190, China

<sup>b</sup> College of Chemical Engineering, Beijing Advanced Innovation Center for Soft Matter Science and Engineering, Beijing University of Chemical Technology, Beijing 100029, China

<sup>c</sup> Key Laboratory of Theoretical & Computational Photochemistry of Ministry of Education, College of Chemistry, Beijing Normal University, Beijing 100875, China

<sup>d</sup> School of Chemical Sciences, University of Chinese Academy of Sciences, Beijing 100049, China

<sup>‡</sup> These authors contributed equally to this work.

\* Corresponding author. E-mail: runlong@bnu.edu.cn (R. L.); hujs@iccas.ac.cn (J. H.)

## Materials and Methods

### Materials

The raw materials of Cesium iodide (CsI, 99.999%), lead iodide (PbI<sub>2</sub>, 99.999%), lead bromide (PbBr<sub>2</sub>, 99.999%), dimethylformamide (DMF, anhydrous, ≥99.9%), dimethyl sulfoxide (DMSO, anhydrous, ≥99.9%), chlorobenzene (anhydrous, 99.8%) were purchased from Sigma-Aldrich. Dimethylammonium iodide (DMAI) was purchased from Greatcell Solar. Tris[2-(diphenylphosphino)ethyl]phosphine (PP3, 98%) and other phosphorus-based molecules were purchased from Strem. Poly(3-hexylthiophene) (P3HT) was purchased from 1-Material. Tin (IV) oxide (SnO<sub>2</sub>) colloidal solution (15% in H<sub>2</sub>O) was purchased from Alfa Aesar. Titanium (IV) chloride (TiCl<sub>4</sub>) was purchased from Aladdin. The patterned ITO and FTO glass substrates were purchased from Advanced Election Technology.

### Precursor Preparation

The precursor of SnO<sub>2</sub> compact layer was prepared by dissolving SnO<sub>2</sub> colloidal solution with DI water by a weight ratio of 1 : 5. 1.2 mmol CsI, 0.6 mmol PbI<sub>2</sub>, and 0.6 mmol PbBr<sub>2</sub> were mixed in 1 mL DMSO to form the CsPbI<sub>2</sub>Br precursor. 1 mmol CsI, 1 mmol PbI<sub>2</sub>, and 1 mmol DMAI were mixed in 0.9 mL DMF and 0.1 mL DMSO to form the CsPbI<sub>3</sub> precursor. 1.8 mmol PbI<sub>2</sub>, 1.8 mmol FAI, 0.036 mmol CsCl and 0.63 mmol MAcl were mixed in 0.8 mL DMF and 0.2 mL DMSO to form the CsFAPbI<sub>3</sub> precursor. The different concentrations of PP3 or other phosphine molecules were dissolved in chlorobenzene. The P3HT hole transporting layer solution was prepared by dissolving 10 mg P3HT in 1 mL chlorobenzene.

### Device Fabrication

The SnO<sub>2</sub> precursor was spin-coated at 4000 rpm for 30 s on the pre-cleaned ITO substrates and followed by annealing at 150 °C for 30 min in ambient conditions. The inorganic perovskite films were deposited according to our optimized preannealing method. The CsPbI<sub>2</sub>Br precursor was spin-coated at 2000 rpm for 120 s and followed by annealing at 50 °C for 2 min and 160 °C for 10 min. It must be noted that carefully controlling the preannealing process is very critical for achieving highly crystalline perovskite films. Then, the PP3 solution was spin-coated on the inorganic perovskite film at 5000 rpm for 30 s and annealed at 100 °C for 5 min to evaporate the solvent. The P3HT solution was dynamically spin-coated at 3000 rpm for 30 s and annealed at 100

°C for 5 min to improve the interface contact. Finally, Au layers (about 80 nm) were thermally evaporated to complete the device.

For the CsPbI<sub>3</sub> PSCs, the CsPbI<sub>3</sub> precursor was spin-coated on the pre-heated FTO/TiO<sub>2</sub> substrates at 3000 rpm for 30 s and followed by annealing at 190 °C for 12 min in air. The PP3 solution (5 mM) was subsequently spin-coated on the perovskite film and followed by annealing at 100 °C for 5 min. The other procedures are consistent with the CsPbI<sub>2</sub>Br PSCs.

For the CsFAPbI<sub>3</sub> PSCs, the CsFAPbI<sub>3</sub> precursor was spin-coated on FTO/SnO<sub>2</sub> substrate at 5000 rpm for 30 s and 1 mL was dropped on the spinning substrate 10 s before the end. The as-cast films were annealed at 70 °C for 5 min and 120 °C for 30 min. Precise humidity control is important for high-quality perovskite films and device performance. The PP3 solution (5 mM) was subsequently spin-coated on the perovskite film and followed by annealing at 100 °C for 5 min. The other procedures are consistent with the CsPbI<sub>2</sub>Br PSCs.

### **Film and Device Characterization**

The absorption spectra were carried out by UV/vis spectrophotometer (Hitachi, UH-4150). The SEM images were captured by Field-Emission Scanning Electron Microscope (Hitachi, SU4800). The XRD diffraction patterns were conducted by Rigaku DMAX-RB with a Cu-K $\alpha$  X-ray radiation source. Steady-state and time-resolved photoluminescence spectra were measured by Edinburgh Instruments (FLS980). The impedance spectroscopy was carried out by an electrochemical workstation (CHI 660E). The EQE spectra were measured by QE-R3011 (Enlitech) system. The X-ray photoelectron spectroscopy (XPS) and ultraviolet photoelectron spectroscopy (UPS) were detected by a combined XPS/UPS system (Thermo Fisher Scientific, ESCALAB250XI). The *J-V* curves were measured by an ORIEL measurement system with Keithley 2420 source under simulated AM 1.5G irradiation (Oriel Sol3A Class AAA solar simulator, 450W Model 94023A, Newport). The irradiation was calibrated by a certified silicon reference cell (91150-KG5, Newport). The devices were measured under reverse scan (1.2 to -0.2 V) or forward scan (-0.2 to 1.2 V) with a rate of 0.02 V s<sup>-1</sup> in ambient conditions below 30% RH. There were no special preconditioning protocols applied before device measurement. The active area was defined by an opaque aperture with a certified area of 0.0895 cm<sup>2</sup>. For the storage stability test, unencapsulated devices were stored in an air atmosphere with  $\leq 30\%$  RH at 25  $\pm$  5 °C. For the thermal stability test, unencapsulated devices were continuously heated on a hotplate at 85 °C in

N<sub>2</sub>. For long-term operational stability, the encapsulated devices were continuously illuminated in air.

### **Computational Details**

The projector-augmented wave (PAW) method using Vienna Ab initio Simulation Package (VASP) was utilized to carry out DFT calculations. The crystal structure of cubic CsPbI<sub>2</sub>Br bulk structure and slabs were optimized by a generalized gradient approximation (GGA) with Perdew–Burke–Ernzerhof (PBE) method. The structural optimization (self-consistent) was defined by plane-wave cutoff energy at 400 eV and a  $1 \times 1 \times 1$   $\Gamma$  point. The structural optimizations and electronic calculations were also carried out by the van der Waals functional vdW-DF3. Surface slabs with a vacuum thickness of 18 Å were modeled as (001)-terminated slabs of the cubic structure. Two-layer supercell of the  $4 \times 4$  surface was used. All the structures were optimized until the force on each atom was smaller than  $0.02 \text{ eV \AA}^{-1}$  and the convergence threshold for self-consistent iteration is  $10^{-5} \text{ eV}$ . The molecular graphics viewer VESTA was used to plot the crystal structures and charge densities.

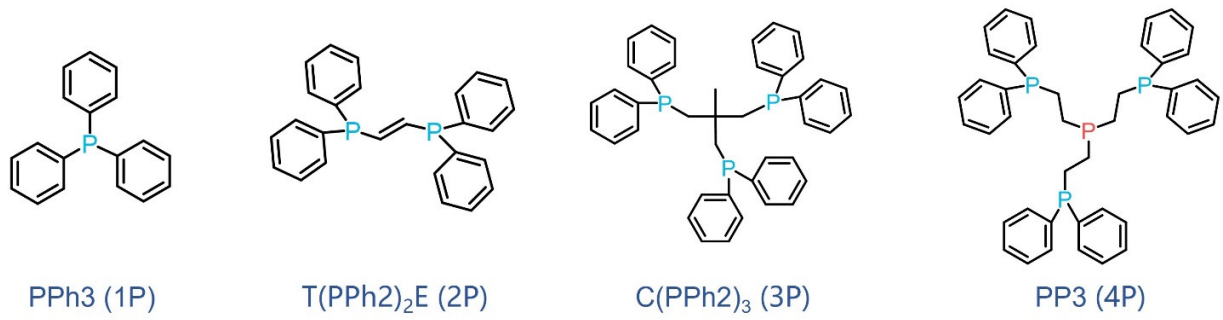

**Fig. S1. Chemical structure of phosphine ligands.**

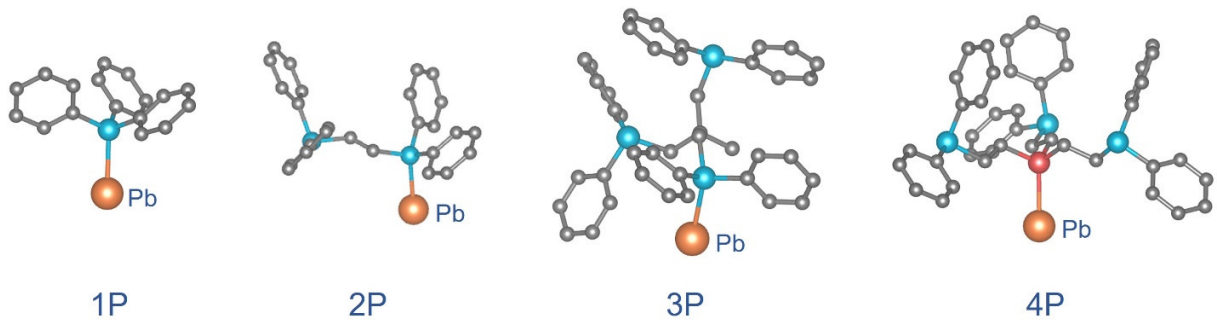

**Fig. S2. Simulated interaction model between phosphine ligands and Pb.**

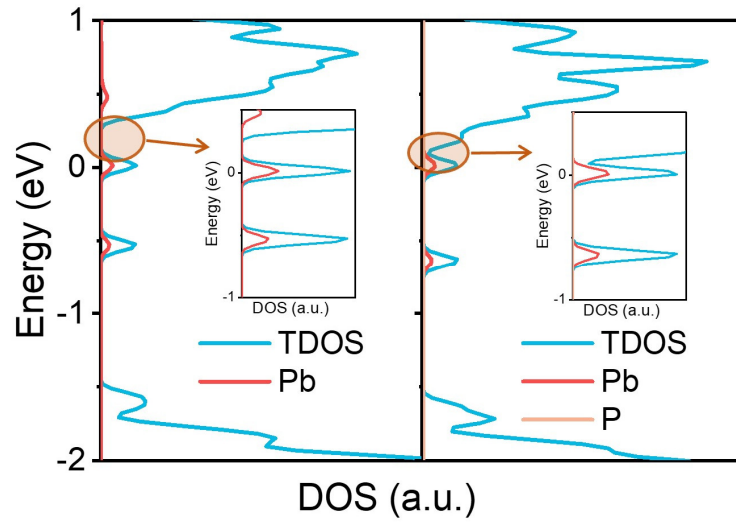

**Fig. S3. Density of state of  $\text{CsPbI}_2\text{Br}$  with and without  $\text{PP}_3$  treatment.**

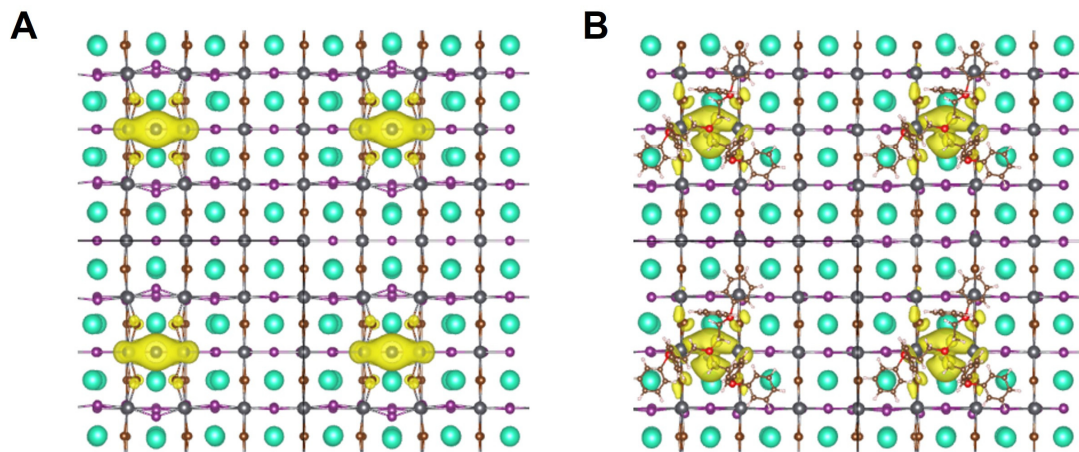

**Fig. S4.** Charge densities of defect state with higher energy level in (A) CsPbI<sub>2</sub>Br with antisite defect and (B) CsPbI<sub>2</sub>Br with antisite defect under PP3 treatment.

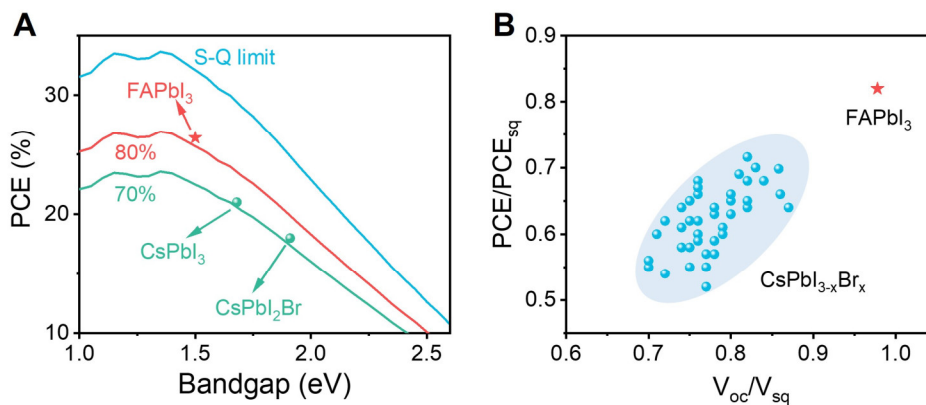

**Fig. S5.** Photovoltaic parameters analysis of reported high-efficiency PSCs.

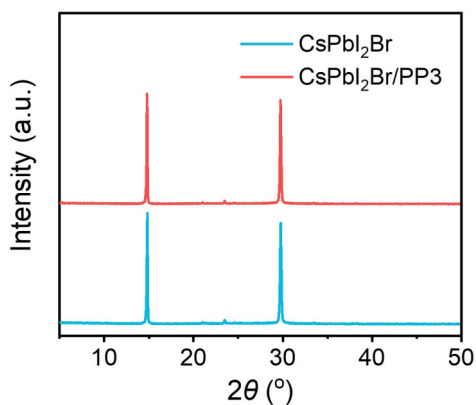

**Fig. S6.** XRD patterns of CsPbI<sub>2</sub>Br with and without PP3 treatment.

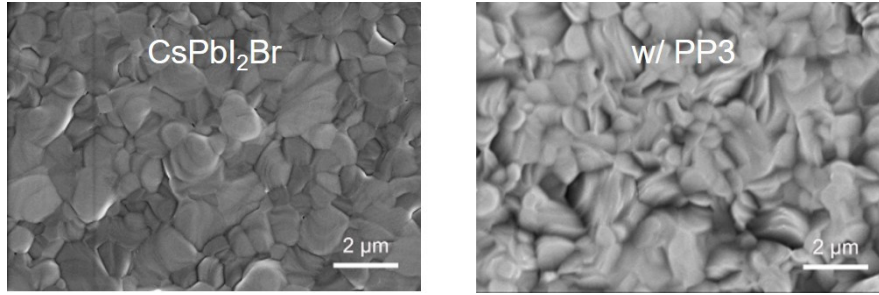

**Fig. S7.** Top-view SEM images of CsPbI<sub>2</sub>Br and CsPbI<sub>2</sub>Br/PP3 films.

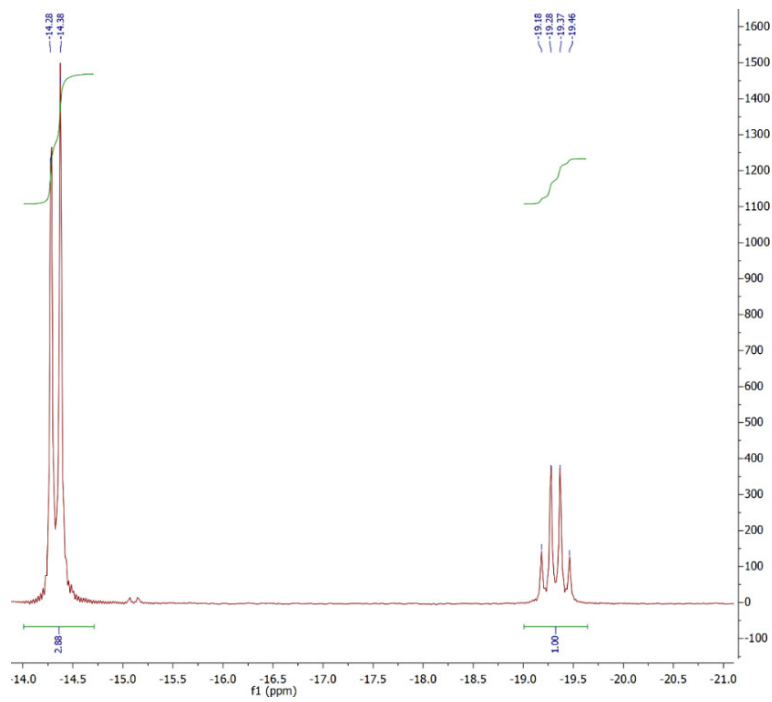

**Fig. S8.** The <sup>31</sup>P NMR spectrum of PP3.

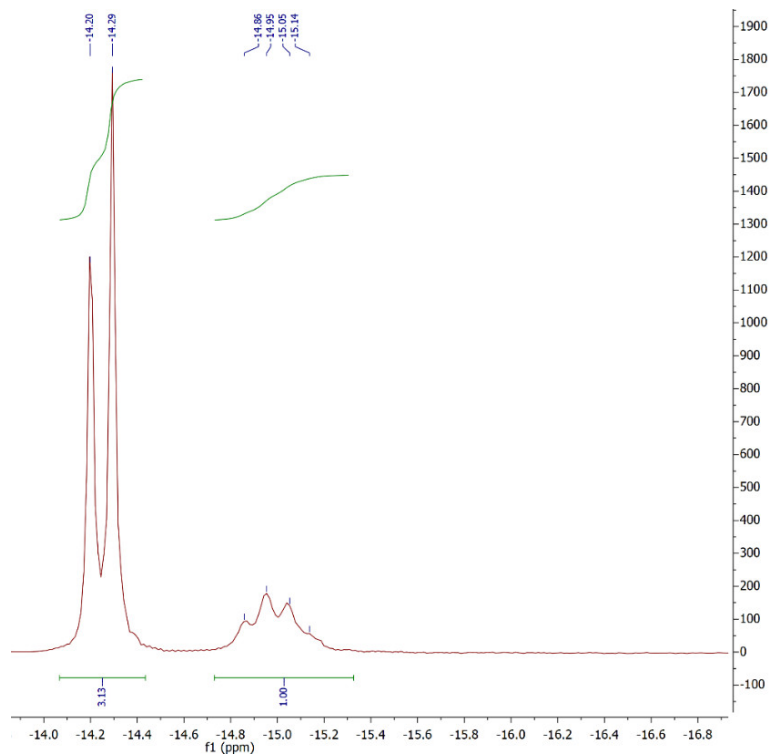

**Fig. S9.** The  $^{31}\text{P}$  NMR spectrum of  $\text{CsPbI}_2\text{Br}/\text{PP3}$ .

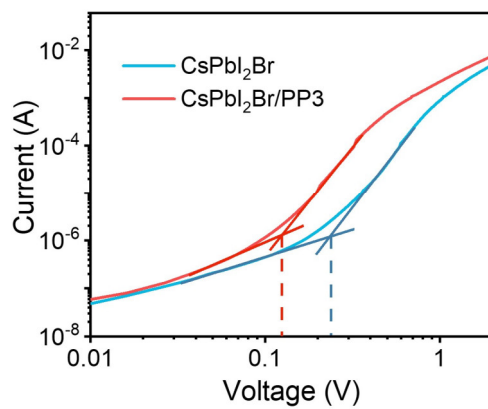

**Fig. S10.** SCLC measurements.



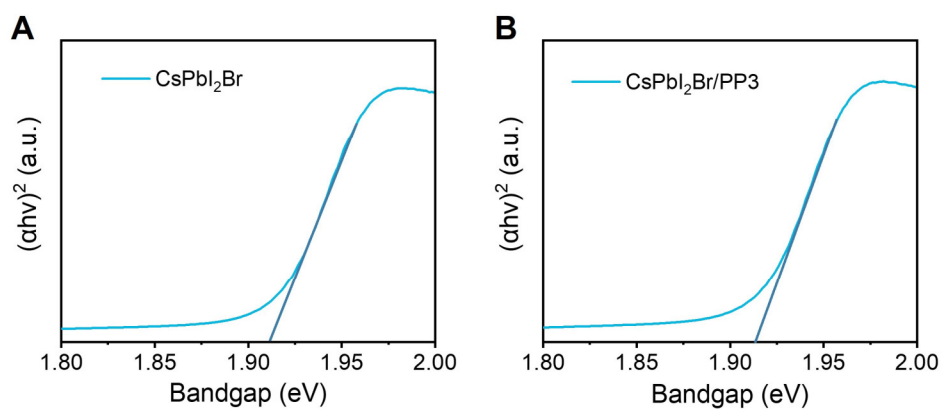

**Fig. S11. Tauc plots of (A) CsPbI<sub>2</sub>Br and (B) CsPbI<sub>2</sub>Br/PP3 films.**

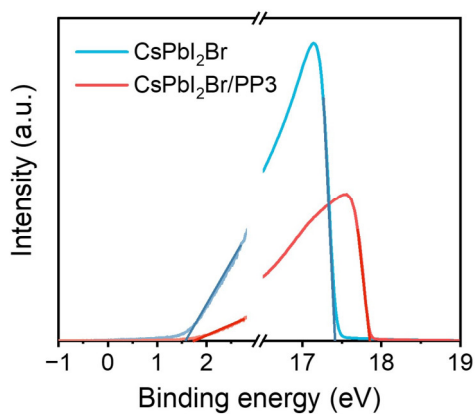

**Fig. S12. UPS spectra.**

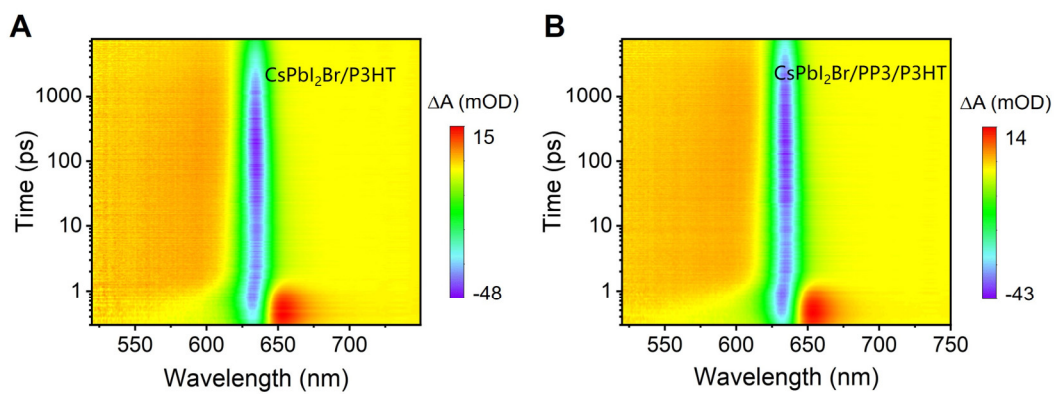

**Fig. S13. 2D TA images of (A) CsPbI<sub>2</sub>Br/P3HT and (B) CsPbI<sub>2</sub>Br/PP3/P3HT samples.**

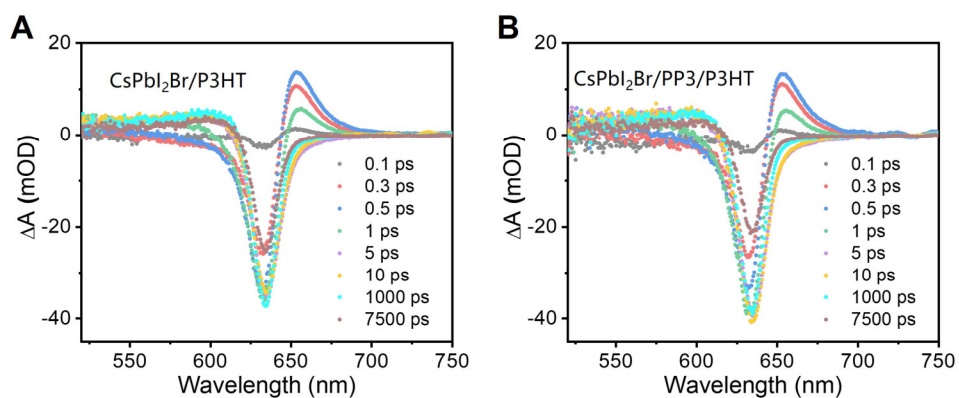

**Fig. S14.** TA spectra of CsPbI<sub>2</sub>Br/P3HT samples (A) without and (B) with PP3 treatment under different probe times.

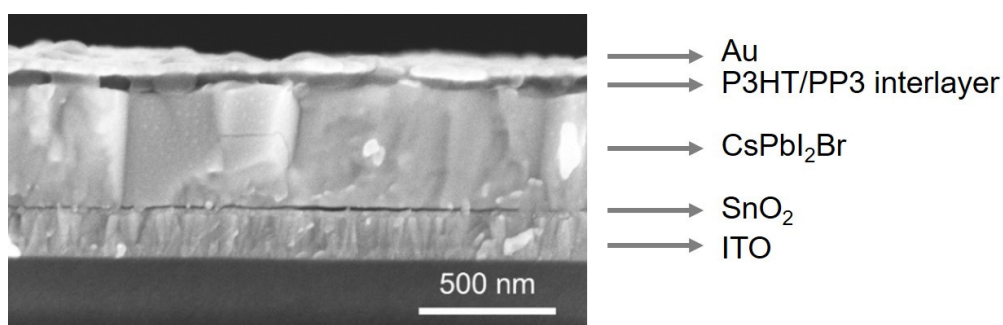

**Fig. S15.** Cross-sectional SEM image of the best PSC with an architecture of ITO/SnO<sub>2</sub>/CsPbI<sub>2</sub>Br/PP3/dopant-free P3HT/Au.

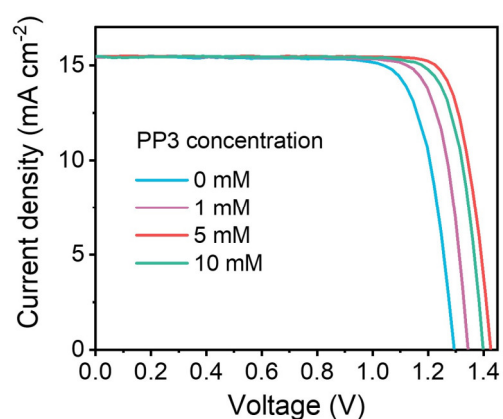

**Fig. S16.** J-V curves of CsPbI<sub>2</sub>Br PSCs with different PP3 concentrations.

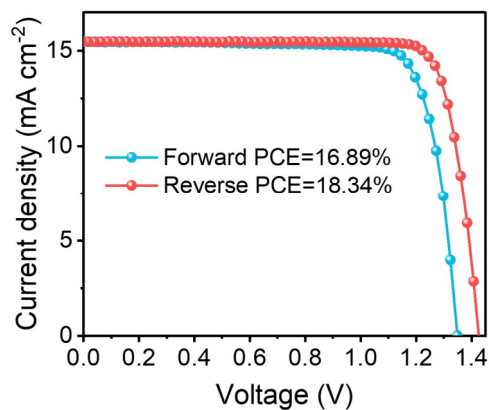

**Fig. S17. J-V curves of the CsPbI<sub>2</sub>Br PSC measured at different scan directions.**

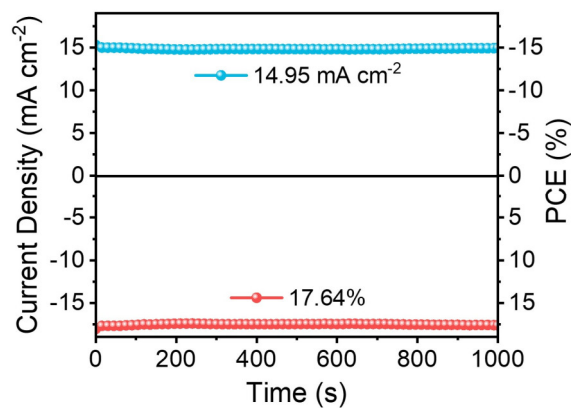

**Fig. S18. Time-dependent stabilized power output of the CsPbI<sub>2</sub>Br PSC.**

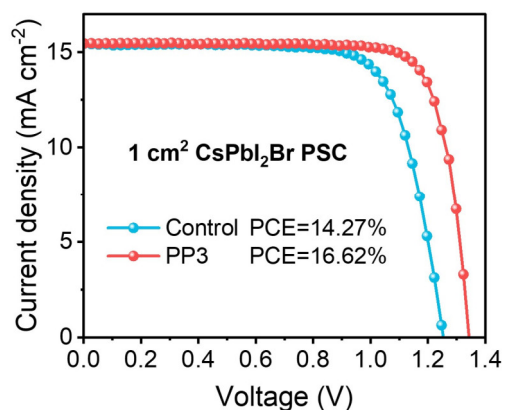

**Fig. S19. J-V curves of 1 cm<sup>2</sup> CsPbI<sub>2</sub>Br PSCs with and without PP3 treatment.**

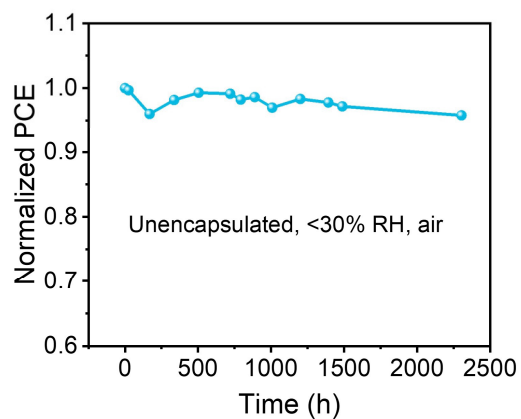

**Fig. S20. Humidity stability test of unencapsulated CsPbI<sub>2</sub>Br PSC stored in air.**

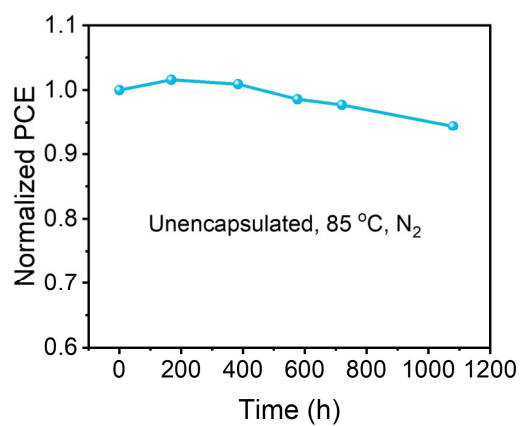

**Fig. S21. Thermal stability test of unencapsulated CsPbI<sub>2</sub>Br PSC at 85 °C in N<sub>2</sub>.**

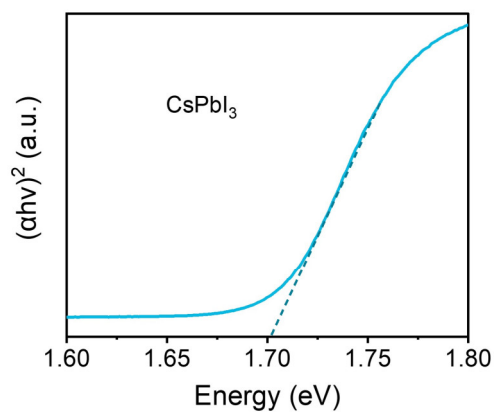

**Fig. S22. Tauc plot of CsPbI<sub>3</sub> perovskite.**

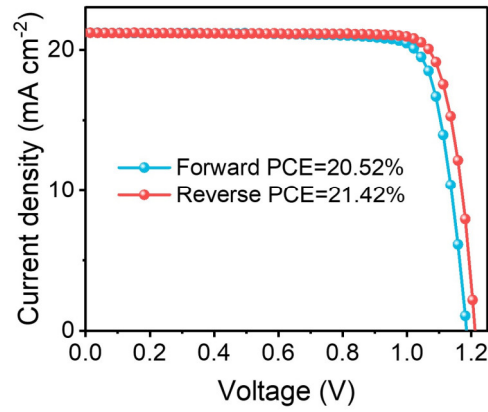

**Fig. S23. J-V curves of CsPbI<sub>3</sub> PSCs measured under different scan directions.**

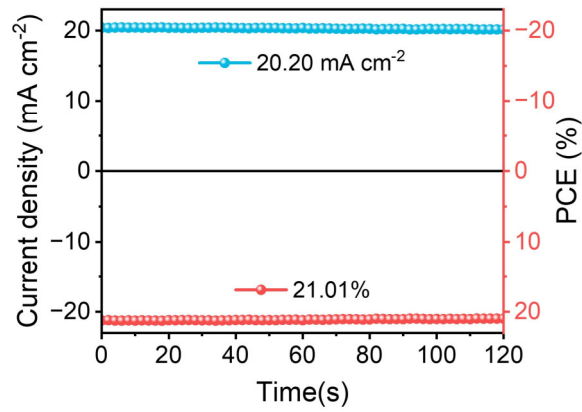

**Fig. S24. Time-dependent stabilized power output of the CsPbI<sub>3</sub> PSC.**

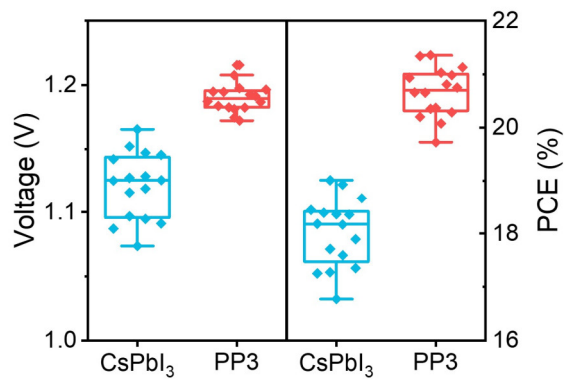

**Fig. S25. Statistic  $V_{oc}$  and PCE distributions of CsPbI<sub>3</sub> PSCs.**

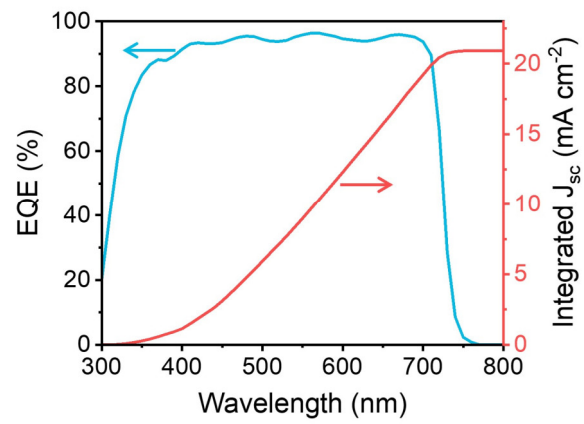

**Fig. S26.** EQE spectrum of the best CsPbI<sub>3</sub> PSC.

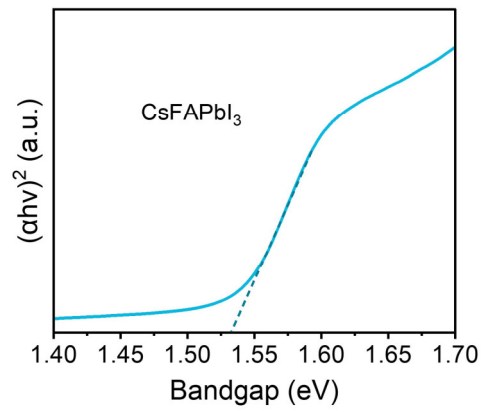

**Fig. S27.** Tauc plot of CsFAPbI<sub>3</sub> perovskite.

Report No: PWQC-WT-P23042021-1R

|                 |                                                                                                                                       |
|-----------------|---------------------------------------------------------------------------------------------------------------------------------------|
| Sample code     | DC2023a042                                                                                                                            |
| Sample S/N      | 3                                                                                                                                     |
| Type            | Single Junction Perovskite Solar Cell                                                                                                 |
| Designated area | 0.08955cm <sup>2</sup><br>The designated area was provided by National Institute of Metrology, China. Test Report No. CDjc2022-04430. |

| Items of testing                 |                                  | Measurement of photovoltaic current-voltage characteristics |                           |         |                     |                   |  |  |
|----------------------------------|----------------------------------|-------------------------------------------------------------|---------------------------|---------|---------------------|-------------------|--|--|
| Sample code                      |                                  | DC2023a042                                                  |                           |         |                     |                   |  |  |
| Results                          | Voltage Sweep                    | Isc (mA)                                                    | Jsc (mA/cm <sup>2</sup> ) | Voc (V) | Pm (mW)             | File              |  |  |
|                                  |                                  | 2.320                                                       | 25.908                    | 1.159   | 2.182               |                   |  |  |
|                                  | Forward                          | Ipm (mA)                                                    | Vpm (V)                   | FF (%)  | E <sub>ff</sub> (%) | A20230420095623-f |  |  |
|                                  |                                  | 2.182                                                       | 1.000                     | 81.16   | 24.37               |                   |  |  |
|                                  | Reverse                          | Ipm (mA)                                                    | Vpm (V)                   | FF (%)  | E <sub>ff</sub> (%) | A20230420095623-r |  |  |
|                                  |                                  | 2.317                                                       | 25.873                    | 1.161   | 2.197               |                   |  |  |
|                                  | Measurement uncertainty:         |                                                             |                           |         |                     |                   |  |  |
|                                  | U <sub>95(Isc)</sub> =1.9% (k=2) |                                                             |                           |         |                     |                   |  |  |
| U <sub>95(Voc)</sub> =1.8% (k=2) |                                  |                                                             |                           |         |                     |                   |  |  |
| U <sub>95(Pm)</sub> =2.5% (k=2)  |                                  |                                                             |                           |         |                     |                   |  |  |

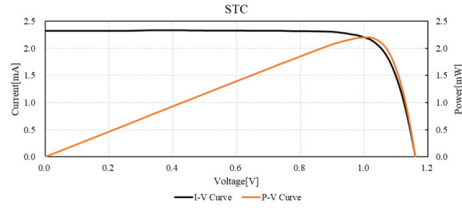

Report No: PWQC-WT-P23042021-1R

|                 |                                       |
|-----------------|---------------------------------------|
| Type            | Single Junction Perovskite Solar Cell |
| Ser.No          | DC2023a042                            |
| Area            | 8.955 mm <sup>2</sup>                 |
| Isc             | 2.320 mA                              |
| Jsc             | 25.908 mA/cm <sup>2</sup>             |
| Voc             | 1.159 V                               |
| FF              | 81.16 %                               |
| Pm              | 2.182 mW                              |
| E <sub>ff</sub> | 24.37 %                               |
| Ipm             | 2.182 mA                              |
| Vpm             | 1.000 V                               |
| Voltage Sweep   | Forward                               |
| Sweep time      | 6.6 s                                 |
| Temp            | 25 °C                                 |
| Irr             | 100 mW/cm <sup>2</sup>                |
| File            | A20230420095623-f                     |

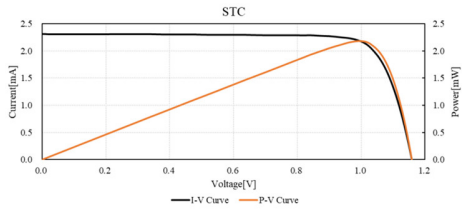

Report No: PWQC-WT-P23042021-1R

|                 |                                       |
|-----------------|---------------------------------------|
| Type            | Single Junction Perovskite Solar Cell |
| Ser.No          | DC2023a042                            |
| Area            | 8.955 mm <sup>2</sup>                 |
| Isc             | 2.317 mA                              |
| Jsc             | 25.873 mA/cm <sup>2</sup>             |
| Voc             | 1.161 V                               |
| FF              | 81.71 %                               |
| Pm              | 2.197 mW                              |
| E <sub>ff</sub> | 24.54 %                               |
| Ipm             | 2.154 mA                              |
| Vpm             | 1.020 V                               |
| Voltage Sweep   | Reverse                               |
| Sweep time      | 6.6 s                                 |
| Temp            | 25 °C                                 |
| Irr             | 100 mW/cm <sup>2</sup>                |
| File            | A20230420095623-r                     |

Fig. S28. Third-party certification report of the champion CsFAPbI<sub>3</sub>/P3HT PSC.

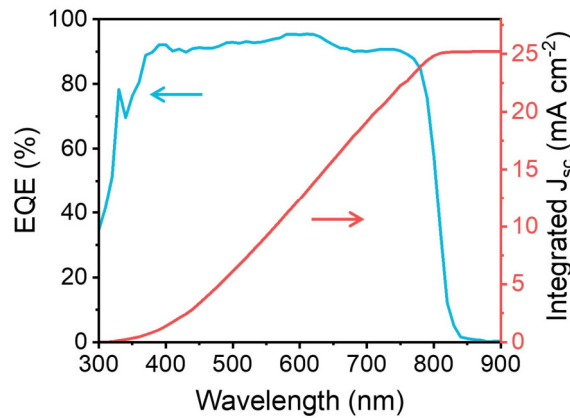

Fig. S29. EQE spectrum of the best CsFAPbI<sub>3</sub> PSC.

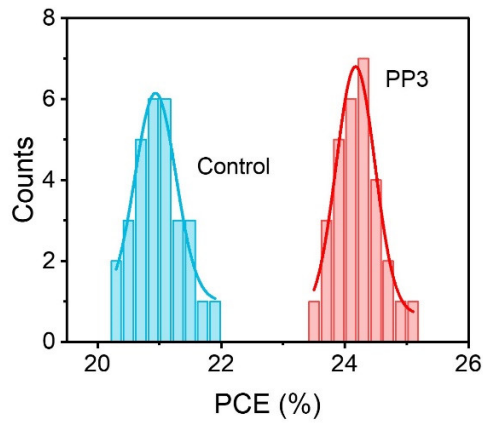

**Fig. S30. Statistic PCE distributions of CsFAPbI<sub>3</sub> PSCs.**

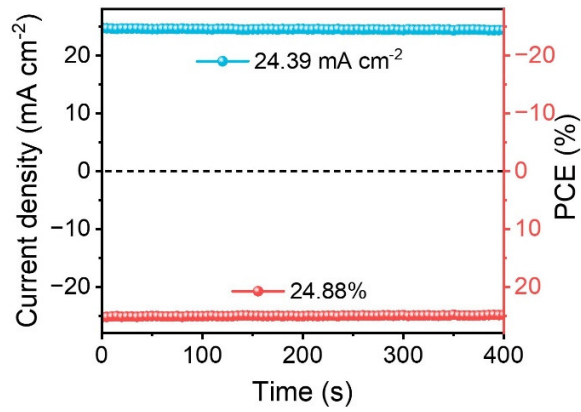

**Fig. S31. Stabilized power output of the best CsFAPbI<sub>3</sub> PSC.**

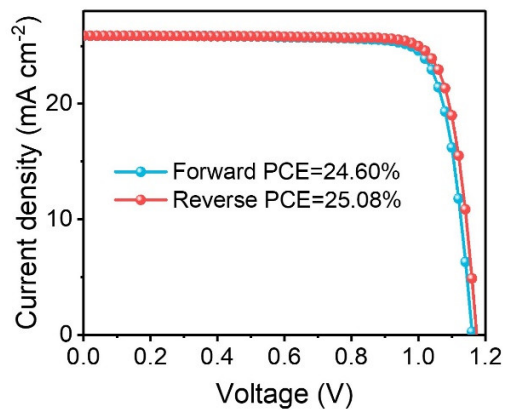

**Fig. S32. J-V curves of the CsFAPbI<sub>3</sub> PSC measured at different scan directions.**



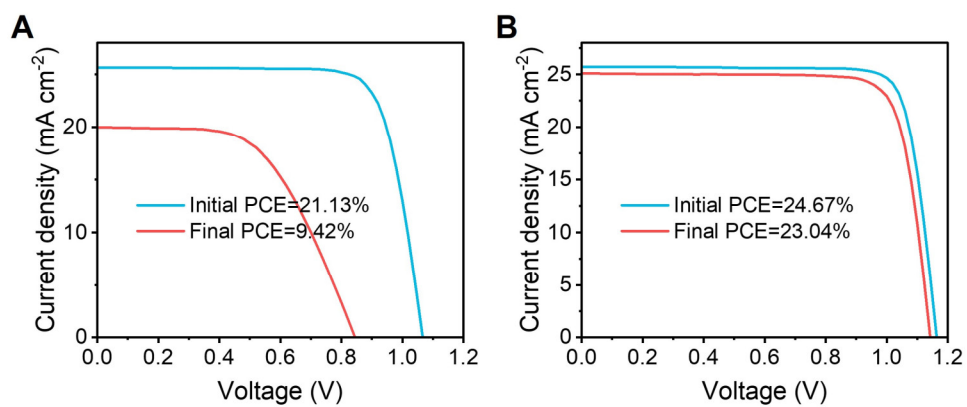

**Fig. S33. J-V curves of the (A) control and (B) PP3-treated CsFAPbI<sub>3</sub> PSCs before and after operational stability test.**

**Table S1. Fitted results of time-resolved PL decay curves.**

| Condition                 | $\tau_1$ (ns) | $\tau_2$ (ns) | $A_1$ (%) | $A_2$ (%) | $\tau_{\text{average}}$ (ns) |
|---------------------------|---------------|---------------|-----------|-----------|------------------------------|
| CsPbI <sub>2</sub> Br     | 12.42         | 37.29         | 62.61     | 37.39     | 21.72                        |
| CsPbI <sub>2</sub> Br/PP3 | 15.38         | 72.15         | 22.98     | 77.02     | 59.10                        |

The results were fitted according to the bi-exponential function:  $PL_{\text{intensity}} = A_1 \exp(-t/\tau_1) + A_2 \exp(-t/\tau_2)$ . All the samples were directly deposited on glass substrates without a charge transfer layer.

**Table S2. Summary of energy level parameters for control and PP3-treated CsPbI<sub>2</sub>Br.**

| Condition                 | $E_{\text{Cut-off}}$ (eV) | WF (eV) | $E_{\text{Onset}}$ (eV) | $E_{\text{VBM}}$ (eV) | $E_{\text{CBM}}$ (eV) | $E_g$ (eV) |
|---------------------------|---------------------------|---------|-------------------------|-----------------------|-----------------------|------------|
| CsPbI <sub>2</sub> Br     | 17.41                     | 3.81    | 1.56                    | 5.37                  | 3.46                  | 1.91       |
| CsPbI <sub>2</sub> Br/PP3 | 17.85                     | 3.37    | 1.72                    | 5.09                  | 3.18                  | 1.91       |

**Table S3. Statistical photovoltaic parameters of control and PP3-treated CsPbI<sub>2</sub>Br PSCs.**

| Condition                 | $V_{\text{oc}}$ (V) | $J_{\text{sc}}$ (mA cm <sup>-2</sup> ) | FF        | PCE (%)    |
|---------------------------|---------------------|----------------------------------------|-----------|------------|
| CsPbI <sub>2</sub> Br     | 1.27±0.03           | 15.45±0.15                             | 0.77±0.02 | 15.09±0.36 |
| CsPbI <sub>2</sub> Br/PP3 | 1.39±0.02           | 15.47±0.05                             | 0.81±0.01 | 17.67±0.32 |

**Table S4. Photovoltaic performance of CsPbI<sub>2</sub>Br PSCs with different concentrations of PP3 treatment.**

| <b>Condition (mM/mL)</b> | <b>V<sub>oc</sub> (V)</b> | <b>J<sub>sc</sub> (mA cm<sup>-2</sup>)</b> | <b>FF</b> | <b>PCE (%)</b> |
|--------------------------|---------------------------|--------------------------------------------|-----------|----------------|
| 0                        | 1.29                      | 15.43                                      | 0.792     | 15.79          |
| 1                        | 1.34                      | 15.44                                      | 0.819     | 16.96          |
| 5                        | 1.43                      | 15.46                                      | 0.832     | 18.39          |
| 10                       | 1.40                      | 15.46                                      | 0.819     | 17.72          |

**Table S5. Summary of photovoltaic parameters for state-of-the-art inorganic CsPbI<sub>2</sub>Br PSCs with dopant-free HTLs.**

| HTL         | Dopant      | Perovskite                           | V <sub>oc</sub> (V) | V <sub>oc</sub> loss (V) | PCE (%)      | Ref.             |
|-------------|-------------|--------------------------------------|---------------------|--------------------------|--------------|------------------|
| PSQ2        | Free        | CsPbI <sub>2</sub> Br                | 1.27                | 0.64                     | 15.50        | [1]              |
| TEP-S       | Free        | CsPbI <sub>2</sub> Br                | 1.26                | 0.65                     | 15.60        | [2]              |
| PBDB-T-Si   | Free        | CsPbI <sub>2</sub> Br                | 1.20                | 0.71                     | 15.60        | [3]              |
| PDCBT       | Free        | CsPbI <sub>2</sub> Br                | 1.24                | 0.67                     | 16.41        | [4]              |
| PBDB-T      | Free        | CsPbI <sub>2</sub> Br                | 1.24                | 0.67                     | 16.40        | [5]              |
| PolyTPD     | Free        | CsPbI <sub>2</sub> Br                | 1.24                | 0.67                     | 16.84        | [6]              |
| SFDT-TDM    | Free        | CsPbI <sub>x</sub> Br <sub>3-x</sub> | 1.28                | 0.54                     | 17.10        | [7]              |
| NiOx        | Free        | CsPbI <sub>2</sub> Br                | 1.30                | 0.61                     | 17.02        | [8]              |
| P3HT        | Free        | CsPbI <sub>x</sub> Br <sub>3-x</sub> | 1.12                | 0.63                     | 14.08        | [9]              |
| P3HT        | Free        | CsPbI <sub>x</sub> Br <sub>3-x</sub> | 1.12                | 0.63                     | 15.84        | [10]             |
| P3HT        | Free        | CsPbI <sub>2</sub> Br                | 1.27                | 0.64                     | 10.8         | [11]             |
| P3HT        | Free        | CsPbI <sub>2</sub> Br                | 1.07                | 0.84                     | 11.30        | [12]             |
| P3HT        | Free        | CsPbI <sub>2</sub> Br                | 1.15                | 0.76                     | 12.46        | [13]             |
| P3HT        | Free        | CsPbI <sub>2</sub> Br                | 1.23                | 0.69                     | 13.25        | [14]             |
| P3HT        | Free        | CsPbI <sub>2</sub> Br                | 1.19                | 0.72                     | 13.91        | [15]             |
| P3HT        | Free        | CsPbI <sub>2</sub> Br                | 1.24                | 0.67                     | 14.35        | [16]             |
| P3HT        | Free        | CsPbI <sub>2</sub> Br                | 1.26                | 0.65                     | 15.50        | [17]             |
| P3HT        | Free        | CsPbI <sub>2</sub> Br                | 1.30                | 0.61                     | 15.69        | [18]             |
| P3HT        | Free        | CsPbI <sub>2</sub> Br                | 1.32                | 0.59                     | 15.90        | [19]             |
| P3HT        | Free        | CsPbI <sub>2</sub> Br                | 1.31                | 0.6                      | 16.30        | [20]             |
| P3HT        | Free        | CsPbI <sub>2</sub> Br                | 1.38                | 0.53                     | 16.93        | [21]             |
| <b>P3HT</b> | <b>Free</b> | <b>CsPbI<sub>2</sub>Br</b>           | <b>1.43</b>         | <b>0.48</b>              | <b>18.39</b> | <b>This work</b> |

**Table S6. Statistical photovoltaic parameters of control and PP3-treated CsPbI<sub>3</sub> PSCs.**

| Condition               | V <sub>oc</sub> (V) | J <sub>sc</sub> (mA cm <sup>-2</sup> ) | FF        | PCE (%)    |
|-------------------------|---------------------|----------------------------------------|-----------|------------|
| CsPbI <sub>3</sub>      | 1.12±0.03           | 21.07±0.09                             | 0.78±0.02 | 18.35±0.59 |
| CsPbI <sub>3</sub> /PP3 | 1.19±0.01           | 21.18±0.08                             | 0.82±0.01 | 20.77±0.42 |

**Table S7. Summary of photovoltaic parameters for state-of-the-art inorganic CsPbI<sub>3</sub> PSCs with dopant-free HTLs.**

| HTL         | Dopant      | Perovskite               | V <sub>oc</sub> (V) | V <sub>oc</sub> loss (V) | PCE (%)      | Ref.             |
|-------------|-------------|--------------------------|---------------------|--------------------------|--------------|------------------|
| CI-TTIN-2F  | Free        | CsPbI <sub>3</sub>       | 1.10                | 0.60                     | 15.91        | [22]             |
| P3HT        | Free        | CsPbI <sub>3</sub>       | 1.09                | 0.61                     | 17.13        | [23]             |
| P3HT        | Free        | CsPbI <sub>3</sub>       | 1.10                | 0.60                     | 17.92        | [24]             |
| P3CT-N      | Free        | CsPbI <sub>3</sub>       | 1.07                | 0.63                     | 16.67        | [25]             |
| P3CT-N      | Free        | CsPbI <sub>3</sub>       | 1.10                | 0.60                     | 18.21        | [26]             |
| P3CT-N      | Free        | CsPbI <sub>3</sub>       | 1.176               | 0.524                    | 18.93        | [27]             |
| P3CT-N      | Free        | CsPbI <sub>3</sub>       | 1.172               | 0.528                    | 19.01        | [28]             |
| P3CT-N      | Free        | CsPbI <sub>3</sub>       | 1.160               | 0.54                     | 19.25        | [29]             |
| P3CT-N      | Free        | CsPbI <sub>3</sub>       | 1.225               | 0.475                    | 19.27        | [30]             |
| P3CT-N      | Free        | CsPbI <sub>3</sub>       | 1.213               | 0.487                    | 19.84        | [31]             |
| P3CT        | Free        | CsPbI <sub>3</sub>       | 1.13                | 0.58                     | 20.17        | [32]             |
| MeO-2PACz   | Free        | CsPbI <sub>3</sub>       | 1.16                | 0.58                     | 20.17        | [33]             |
| PTAA        | Free        | CsPbI <sub>3</sub>       | 1.21                | 0.49                     | 19.69        | [34]             |
| <b>P3HT</b> | <b>Free</b> | <b>CsPbI<sub>3</sub></b> | <b>1.21</b>         | <b>0.49</b>              | <b>21.42</b> | <b>This work</b> |

**Table S8. Summary of photovoltaic parameters for state-of-the-art inorganic CsPbI<sub>3</sub> PSCs with dopant-free P3HT HTLs.**

| HTL         | Dopant      | Perovskite                 | V <sub>oc</sub> (V) | PCE (%)      | Certified PCE (%)           | Ref.             |
|-------------|-------------|----------------------------|---------------------|--------------|-----------------------------|------------------|
| P3HT        | Free        | FAMAPb(IBr) <sub>3</sub>   | 1.152               | 23.3         | 22.7                        | [35]             |
| P3HT        | Free        | FAMAPb(IBr) <sub>3</sub>   | 1.09                | 20.67        | /                           | [36]             |
| P3HT:CuPc   | Free        | CsFAMAPb(IBr) <sub>3</sub> | 1.24                | 23.17        | 21.698 (1 cm <sup>2</sup> ) | [37]             |
| P3HT:CuPc   | Free        | CsFAMAPb(IBr) <sub>3</sub> | 1.200               | 23.38        | 23.33 (1 cm <sup>2</sup> )  | [38]             |
| P3HT        | Free        | FAMAPb(IBr) <sub>3</sub>   | 1.15                | 24.6         | /                           | [39]             |
| P3HT        | Free        | MAPbI <sub>3</sub>         | 1.150               | 21.1         | /                           | [40]             |
| P3HT        | Free        | CsFAMAPb(IBr) <sub>3</sub> | 1.15                | 21.2         | /                           | [41]             |
| P3HT        | Free        | CsFAMAPb(IBr) <sub>3</sub> | 1.16                | 22.87        | /                           | [42]             |
| P3HT:NiPc   | Free        | FAMAPb(IBr) <sub>3</sub>   | 1.11                | 23.11        | /                           | [43]             |
| <b>P3HT</b> | <b>Free</b> | <b>CsFAPbI<sub>3</sub></b> | <b>1.17</b>         | <b>25.08</b> | <b>24.54</b>                | <b>This work</b> |

**Table S9. Statistical photovoltaic parameters of control and PP3-treated CsFAPbI<sub>3</sub> PSCs.**

| Condition                 | V <sub>oc</sub> (V) | J <sub>sc</sub> (mA cm <sup>-2</sup> ) | FF        | PCE (%)    |
|---------------------------|---------------------|----------------------------------------|-----------|------------|
| CsFAPbI <sub>3</sub>      | 1.08±0.01           | 25.68±0.13                             | 0.75±0.02 | 21.00±0.40 |
| CsFAPbI <sub>3</sub> /PP3 | 1.16±0.01           | 25.88±0.06                             | 0.80±0.01 | 24.21±0.36 |

## References

- [1] Q. Xiao, J. Tian, Q. Xue, J. Wang, B. Xiong, M. Han, Z. Li, Z. Zhu, H.-L. Yip, Z. a. Li, *Angew. Chem. Int. Ed.* **2019**, *58*, 17724-17730.
- [2] K. Jiang, J. Wang, F. Wu, Q. Xue, Q. Yao, J. Zhang, Y. Chen, G. Zhang, Z. Zhu, H. Yan, L. Zhu, H.-L. Yip, *Adv. Mater.* **2020**, *32*, 1908011.

- [3] P. Wang, H. Wang, M. Jeong, S. M. Lee, B. Du, Y. Mao, F. Ye, H. Zhang, D. Li, D. Liu, C. Yang, T. Wang, *J. Mater. Chem. C* **2020**, *8*, 8507-8514.
- [4] D.-J. Xue, Y. Hou, S.-C. Liu, M. Wei, B. Chen, Z. Huang, Z. Li, B. Sun, A. H. Proppe, Y. Dong, M. I. Saidaminov, S. O. Kelley, J.-S. Hu, E. H. Sargent, *Nat. Commun.* **2020**, *11*, 1514.
- [5] X. Li, W. Chen, S. Wang, G. Xu, S. Liu, Y. Li, Y. Li, *Adv. Funct. Mater.* **2021**, 2010696.
- [6] P. Wang, H. Wang, Y. Mao, H. Zhang, F. Ye, D. Liu, T. Wang, *Adv. Sci.* **2020**, *7*, 2000421.
- [7] J. Wang, X. Wu, Y. Liu, T. Qin, K. Zhang, N. Li, J. Zhao, R. Ye, Z. Fan, Z. Chi, Z. Zhu, *Adv. Energy Mater.* **2021**, *11*, 2100967.
- [8] S. Yuan, Y. Xian, Y. Long, A. Cabot, W. Li, J. Fan, *Adv. Funct. Mater.* **2021**, *31*, 2106233.
- [9] B. Parida, J. Ryu, S. Yoon, S. Lee, Y. Seo, J. S. Cho, D.-W. Kang, *J. Mater. Chem. A* **2019**, *7*, 18488-18498.
- [10] S. Mu, Q. Ye, X. Zhang, S. Huang, J. You, *Front. Optoelectron.* **2020**, *13*, 265-271.
- [11] F. Yang, D. Hirotani, G. Kapil, M. A. Kamarudin, C. H. Ng, Y. Zhang, Q. Shen, S. Hayase, *Angew. Chem. Int. Ed.* **2018**, *57*, 12745-12749.
- [12] C. F. J. Lau, M. Zhang, X. Deng, J. Zheng, J. Bing, Q. Ma, J. Kim, L. Hu, M. A. Green, S. Huang, A. Ho-Baillie, *ACS Energy Lett.* **2017**, *2*, 2319-2325.
- [13] H. Aqoma, I. F. Imran, F. T. A. Wibowo, N. V. Krishna, W. Lee, A. K. Sarker, D. Y. Ryu, S.-Y. Jang, *Adv. Energy Mater.* **2020**, *10*, 2001188.
- [14] Z. Wang, A. K. Baranwal, M. A. Kamarudin, Y. Kamata, C. H. Ng, M. Pandey, T. Ma, S. Hayase, *J. Mater. Chem. A* **2019**, *7*, 20390-20397.
- [15] Z. Wang, A. K. Baranwal, M. Akmal kamarudin, P. Zhang, G. Kapil, T. Ma, S. Hayase, *Nano Energy* **2019**, *66*, 104180.
- [16] J. H. Heo, D. H. Kim, J. K. Park, Y. K. Choi, D. S. Lee, S. H. Im, *ACS Appl. Mater. Interfaces* **2019**, *11*, 43066-43074.
- [17] M.-H. Li, S.-C. Liu, F.-Z. Qiu, Z.-Y. Zhang, D.-J. Xue, J.-S. Hu, *Adv. Energy Mater.* **2020**, 2000501.
- [18] S. S. Mali, J. V. Patil, J. A. Steele, S. R. Rondiya, N. Y. Dzade, C. K. Hong, *ACS Energy Lett.* **2021**, *6*, 778-788.
- [19] Y. Ding, Q. Guo, Y. Geng, Z. Dai, Z. Wang, Z. Chen, Q. Guo, Z. Zheng, Y. Li, E. Zhou, *Nano Today* **2022**, *46*, 101586.
- [20] J. Song, H. Xie, E. L. Lim, Y. Li, T. Kong, Y. Zhang, X. Zhou, C. Duan, D. Bi, *Solar RRL* **2022**, *6*, 2100880.
- [21] M.-H. Li, J.-Y. Shao, Y. Jiang, F.-Z. Qiu, S. Wang, J. Zhang, G. Han, J. Tang, F. Wang, Z. Wei, Y. Yi, Y.-W. Zhong, J.-S. Hu, *Angew. Chem. Int. Ed.* **2021**, *60*, 16388-16393.
- [22] C. Liu, C. Igci, Y. Yang, O. A. Syzgantseva, M. A. Syzgantseva, K. Rakstys, H. Kanda, N. Shibayama, B. Ding, X. Zhang, V. Jankauskas, Y. Ding, S. Dai, P. J. Dyson, M. K. Nazeeruddin, *Angew. Chem. Int. Ed.* **2021**, *60*, 20489-20497.
- [23] Z. SunLi, Y. Liu, S. Li, J. Ren, Y. Wu, Q. Sun, Y. Cui, M. Chen, Y. Hao, *ACS Appl. Mater. Interfaces* **2022**, *14*, 7417-7427.
- [24] W. Ren, Y. Liu, Y. Wu, Q. Sun, Y. Cui, Y. Hao, *Phys. Chem. Chem. Phys.* **2021**, *23*, 23818-23826.
- [25] S. Fu, L. Wan, W. Zhang, X. Li, W. Song, J. Fang, *ACS Energy Lett.* **2020**, *5*, 3314-3321.

- [26] Z. Xu, N. Liu, X. Liu, W. Han, W. Xu, J. Zhang, L. Huang, Z. Hu, Y. Zhu, *Chem. Eng. J.* **2023**, *451*, 139047.
- [27] S. Fu, W. Zhang, X. Li, J. Guan, W. Song, J. Fang, *ACS Energy Lett.* **2021**, *6*, 3661-3668.
- [28] C. Lu, X. Li, X. Guo, S. Fu, W. Zhang, H. Yuan, J. Fang, *Chem. Eng. J.* **2022**, 139495.
- [29] S. Fu, X. Li, J. Wan, W. Zhang, W. Song, J. Fang, *Adv. Funct. Mater.* **2022**, *32*, 2111116.
- [30] S. Fu, N. Sun, J. Le, W. Zhang, R. Miao, W. Zhang, Y. Kuang, W. Song, J. Fang, *ACS Appl. Mater. Interfaces* **2022**, *14*, 30937-30945.
- [31] S. Fu, J. Le, X. Guo, N. Sun, W. Zhang, W. Song, J. Fang, *Adv. Mater.* **2022**, *34*, 2205066.
- [32] S. Wang, M.-H. Li, Y. Zhang, Y. Jiang, L. Xu, F. Wang, J.-S. Hu, *Energy Environ. Sci.* **2023**, *16*, 2572-2578.
- [33] R. Ji, Z. Zhang, Y. J. Hofstetter, R. Buschbeck, C. Hänisch, F. Paulus, Y. Vaynzof, *Nat. Energy* **2022**, *7*, 1170-1179.
- [34] J. H. Heo, F. Zhang, J. K. Park, H. Joon Lee, D. S. Lee, S. J. Heo, J. M. Luther, J. J. Berry, K. Zhu, S. H. Im, *Joule* **2022**, *6*, 1672-1688.
- [35] J. J. Yoo, G. Seo, M. R. Chua, T. G. Park, Y. Lu, F. Rotermund, Y.-K. Kim, C. S. Moon, N. J. Jeon, J.-P. Correa-Baena, V. Bulović, S. S. Shin, M. G. Bawendi, J. Seo, *Nature* **2021**, *590*, 587-593.
- [36] Y.-W. Jang, S. Lee, K. M. Yeom, K. Jeong, K. Choi, M. Choi, J. H. Noh, *Nat. Energy* **2021**, *6*, 63-71.
- [37] J. Peng, D. Walter, Y. Ren, M. Tebyetekerwa, Y. Wu, T. Duong, Q. Lin, J. Li, T. Lu, M. A. Mahmud, O. L. C. Lem, S. Zhao, W. Liu, Y. Liu, H. Shen, L. Li, F. Kremer, H. T. Nguyen, D.-Y. Choi, K. J. Weber, K. R. Catchpole, T. P. White, *Science* **2021**, *371*, 390-395.
- [38] J. Peng, F. Kremer, D. Walter, Y. Wu, Y. Ji, J. Xiang, W. Liu, T. Duong, H. Shen, T. Lu, F. Brink, D. Zhong, L. Li, O. Lee Cheong Lem, Y. Liu, K. J. Weber, T. P. White, K. R. Catchpole, *Nature* **2022**, *601*, 573-578.
- [39] M. J. Jeong, K. M. Yeom, S. J. Kim, E. H. Jung, J. H. Noh, *Energy Environ. Sci.* **2021**, *14*, 2419-2428.
- [40] F. Cheng, R. He, S. Nie, C. Zhang, J. Yin, J. Li, N. Zheng, B. Wu, *J. Am. Chem. Soc.* **2021**, *143*, 5855-5866.
- [41] F. Cao, F. Cheng, X. Huang, X. Dai, Z. Tang, S. Nie, J. Yin, J. Li, N. Zheng, B. Wu, *Adv. Funct. Mater.* **2022**, *32*, 2201423.
- [42] D. Xu, Z. Gong, Y. Jiang, Y. Feng, Z. Wang, X. Gao, X. Lu, G. Zhou, J.-M. Liu, J. Gao, *Nat. Commun.* **2022**, *13*, 7020.
- [43] H. Kim, D. Y. Lee, J. Lim, J. Kim, J. Park, J. Seidel, J. S. Yun, S. I. Seok, *Adv. Energy Mater.* **2023**, *13*, 2301046.
